# Supplementary material
Source: PubMed Central journal article supplement (PMC8581273)

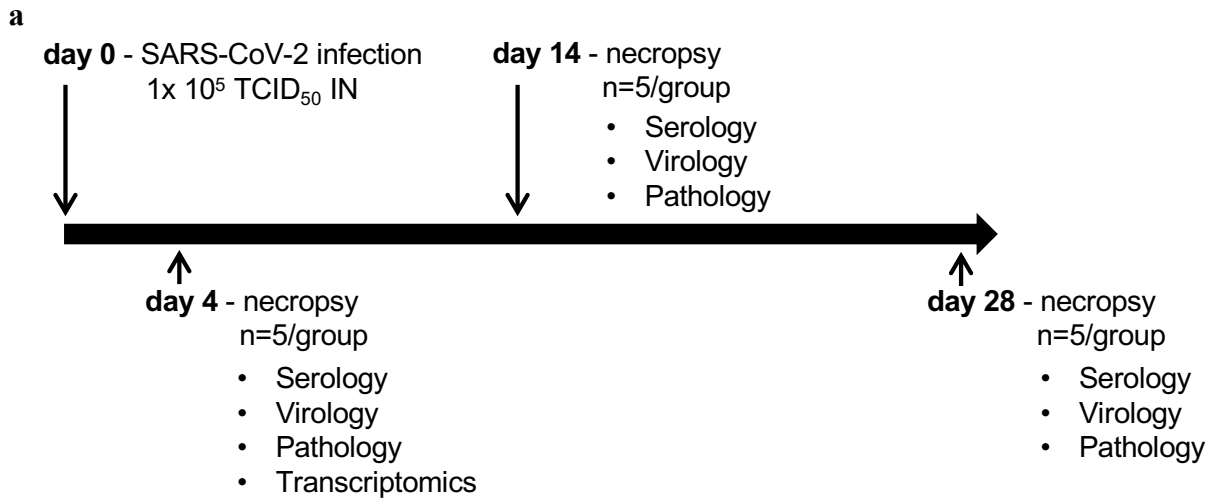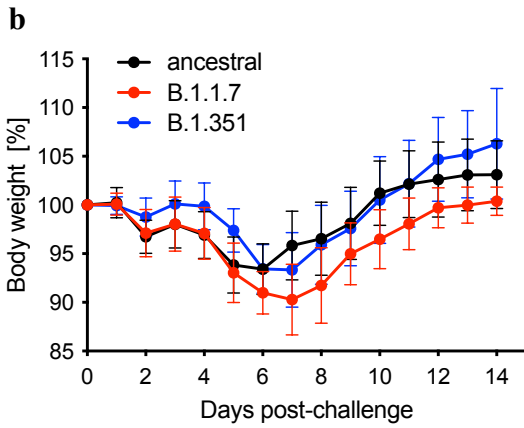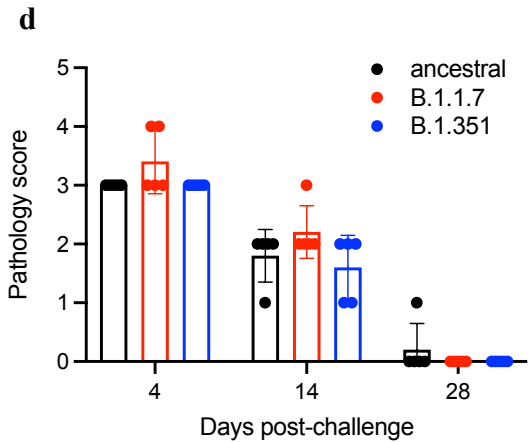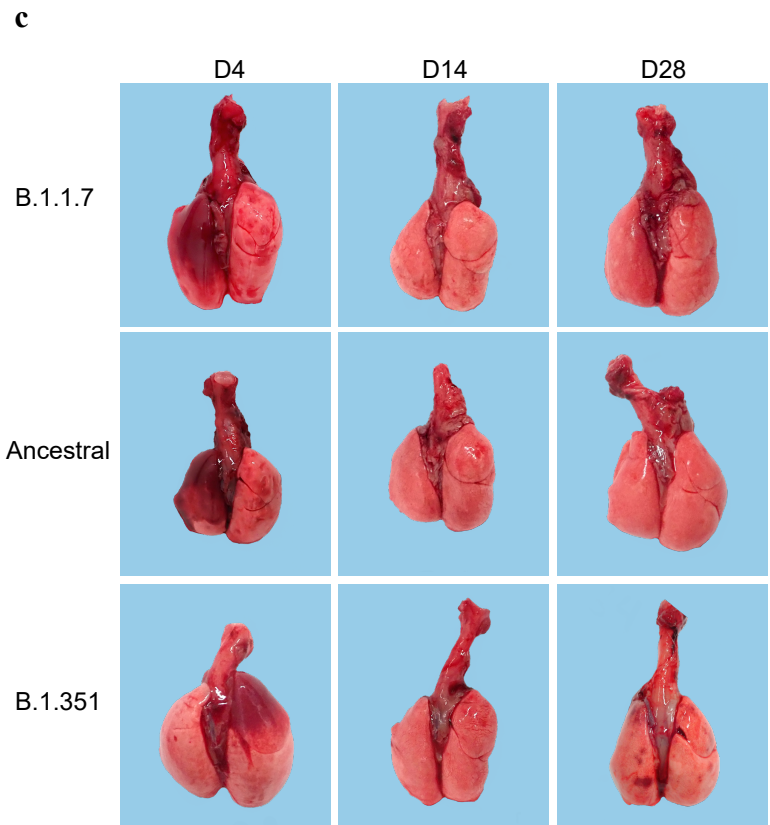

Supplement: mmc2.pdf [file mmc2.pdf]

**Figure S3**

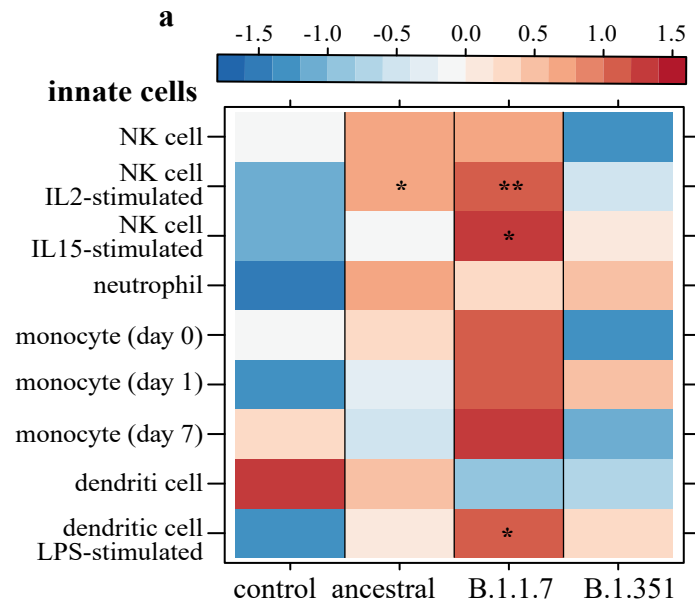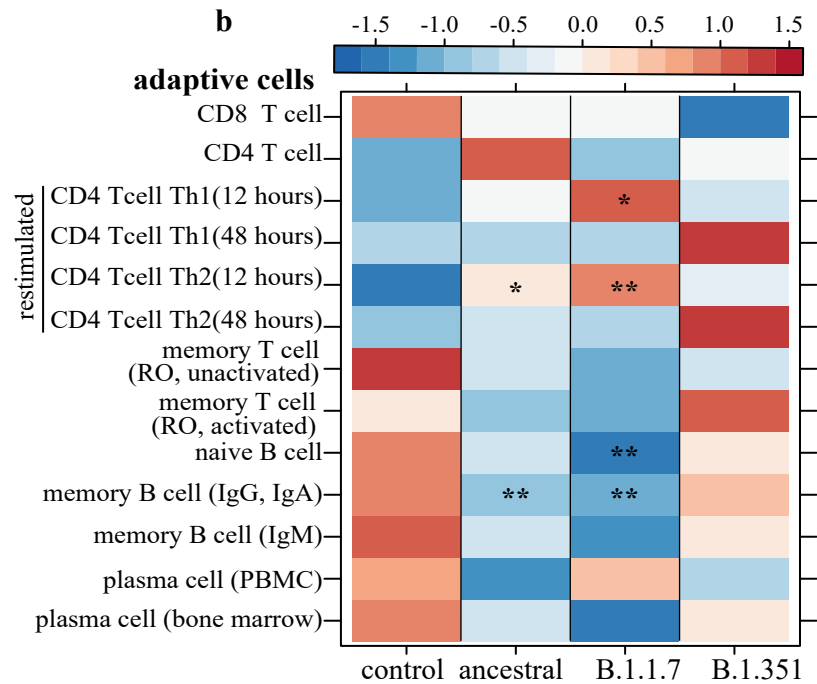

Supplement: mmc4.pdf [file mmc4.pdf]
